# Supplementary figures and images for: Diversity of influenza A viruses retrieved from respiratory disease outbreaks and subclinically infected herds in Spain (2017–2019)
Source: PubMed Central journal article supplement — Transbound Emerg Dis. 2020 Jul 14;68(2):519–30. doi: 10.1111/tbed.13709 (PMC8246522; doi:10.1111/tbed.13709), 2020-07-14

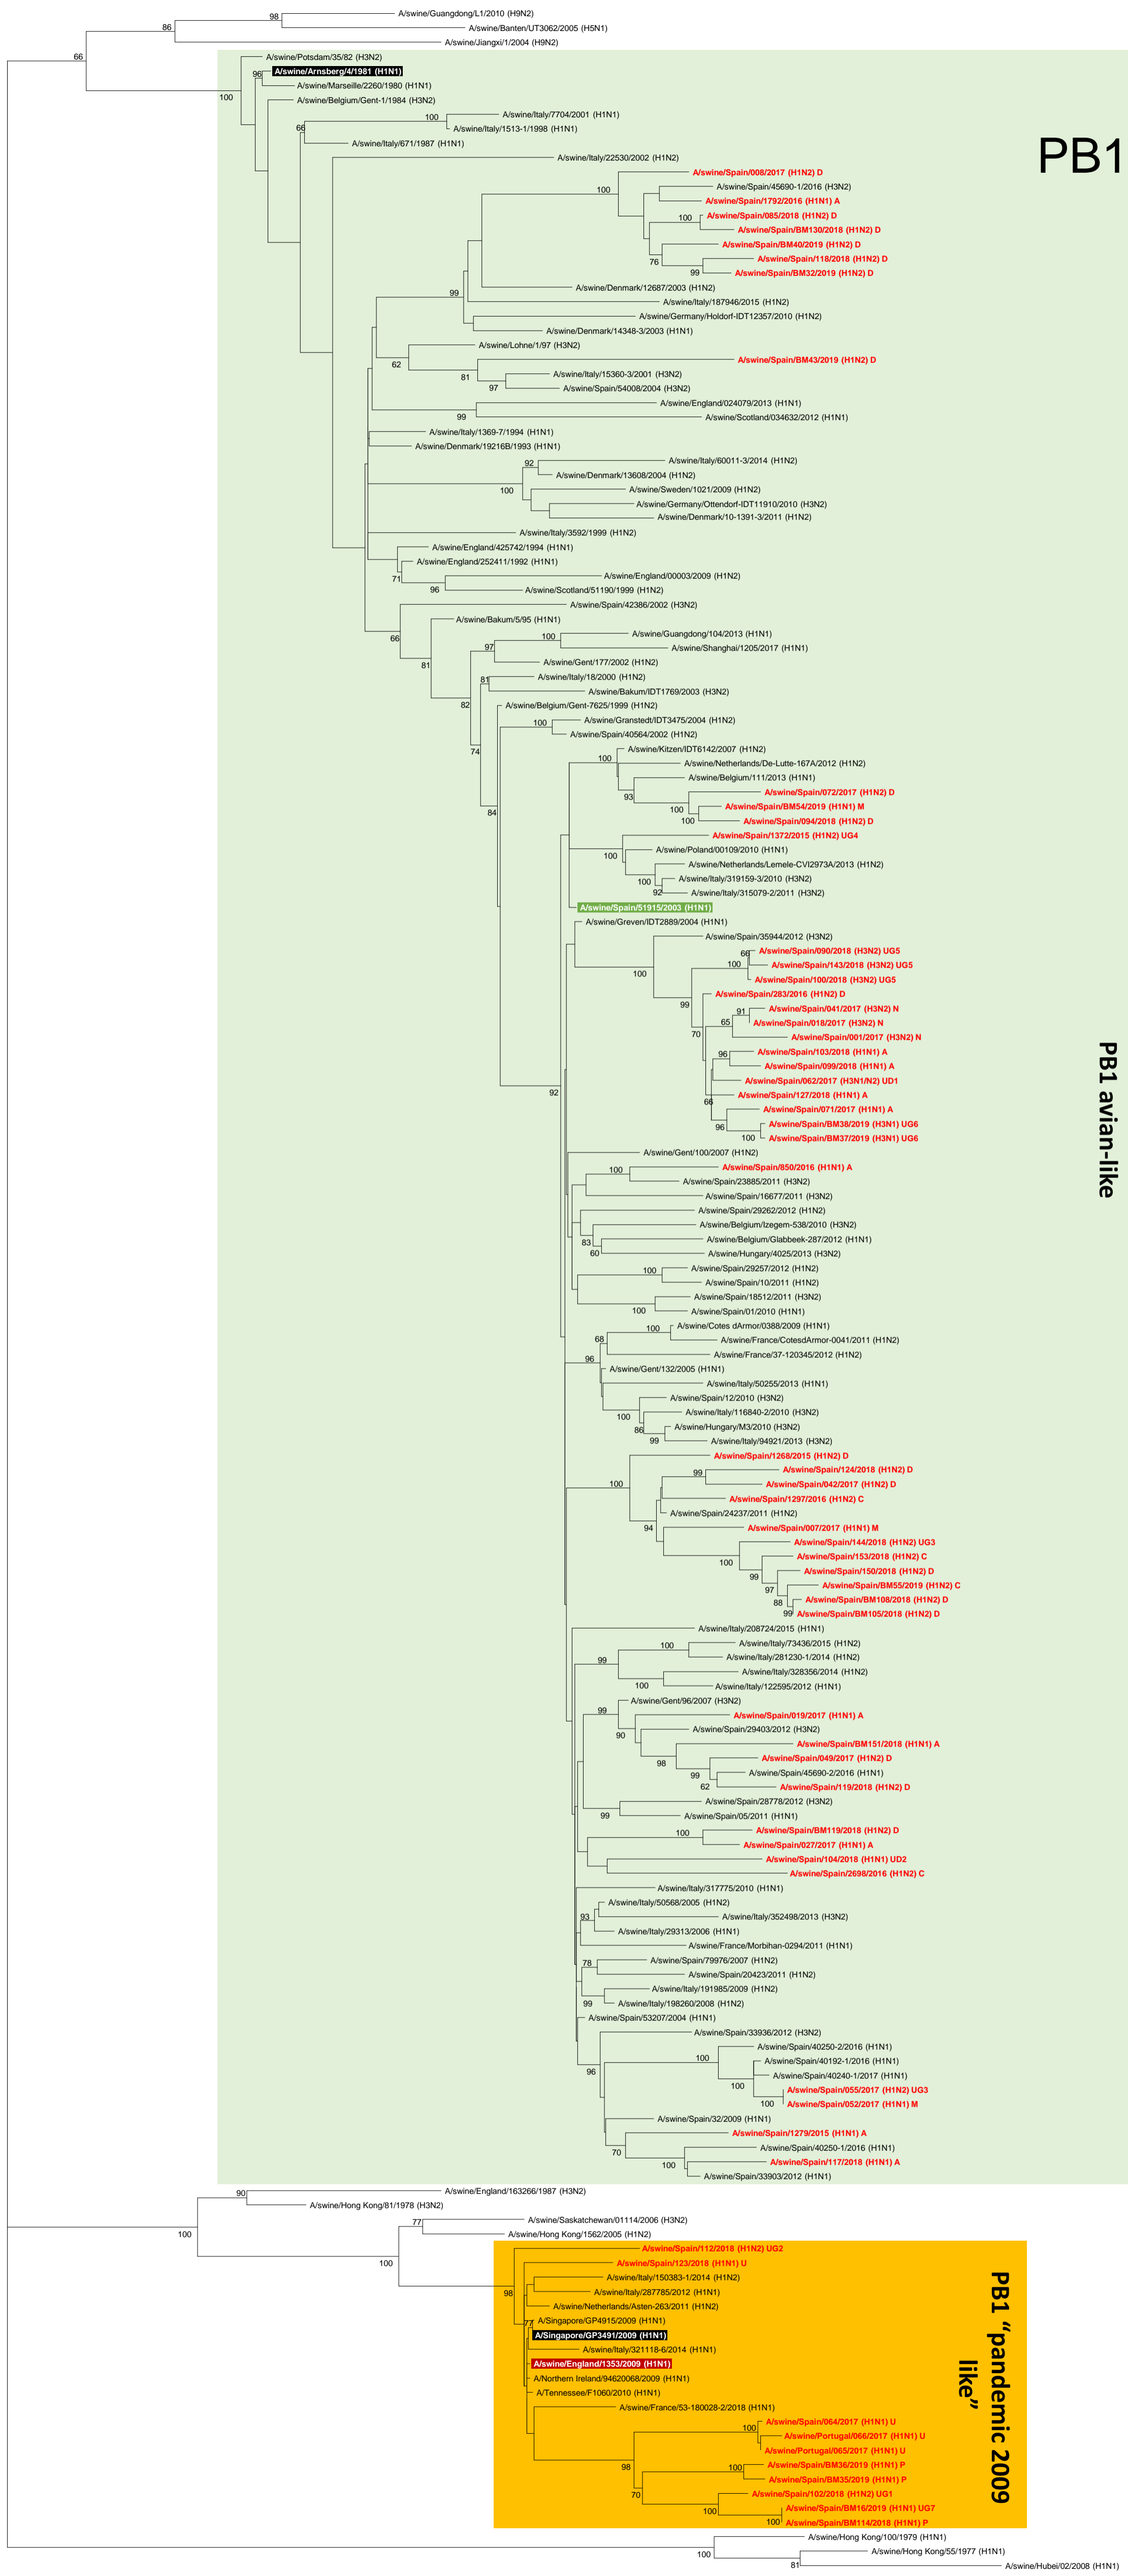

Supplement: TBED-68-519-s001.pdf [file TBED-68-519-s001.pdf]

NS

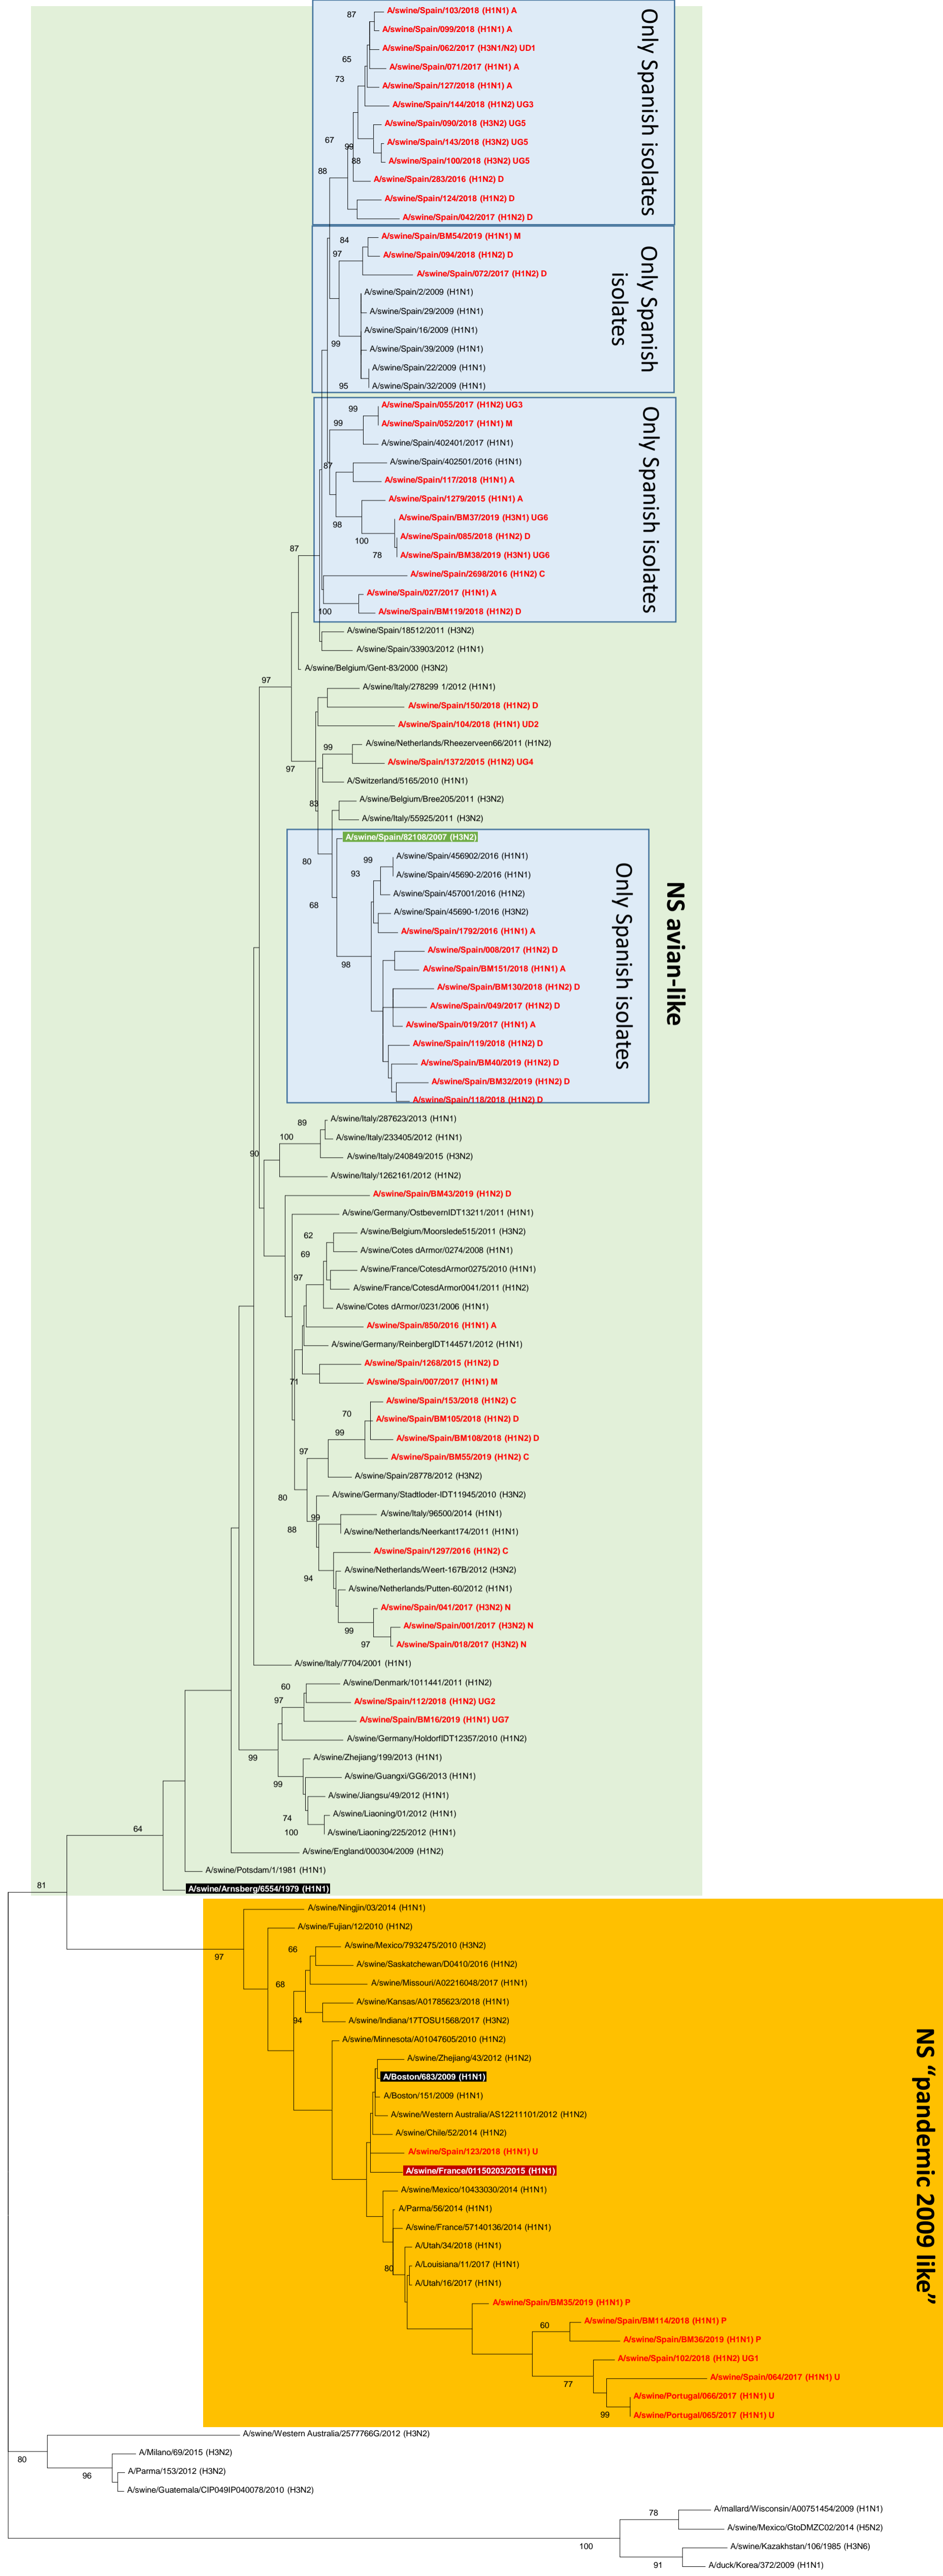

0.05

Supplement: TBED-68-519-s002.pdf [file TBED-68-519-s002.pdf]

PB2

PB2

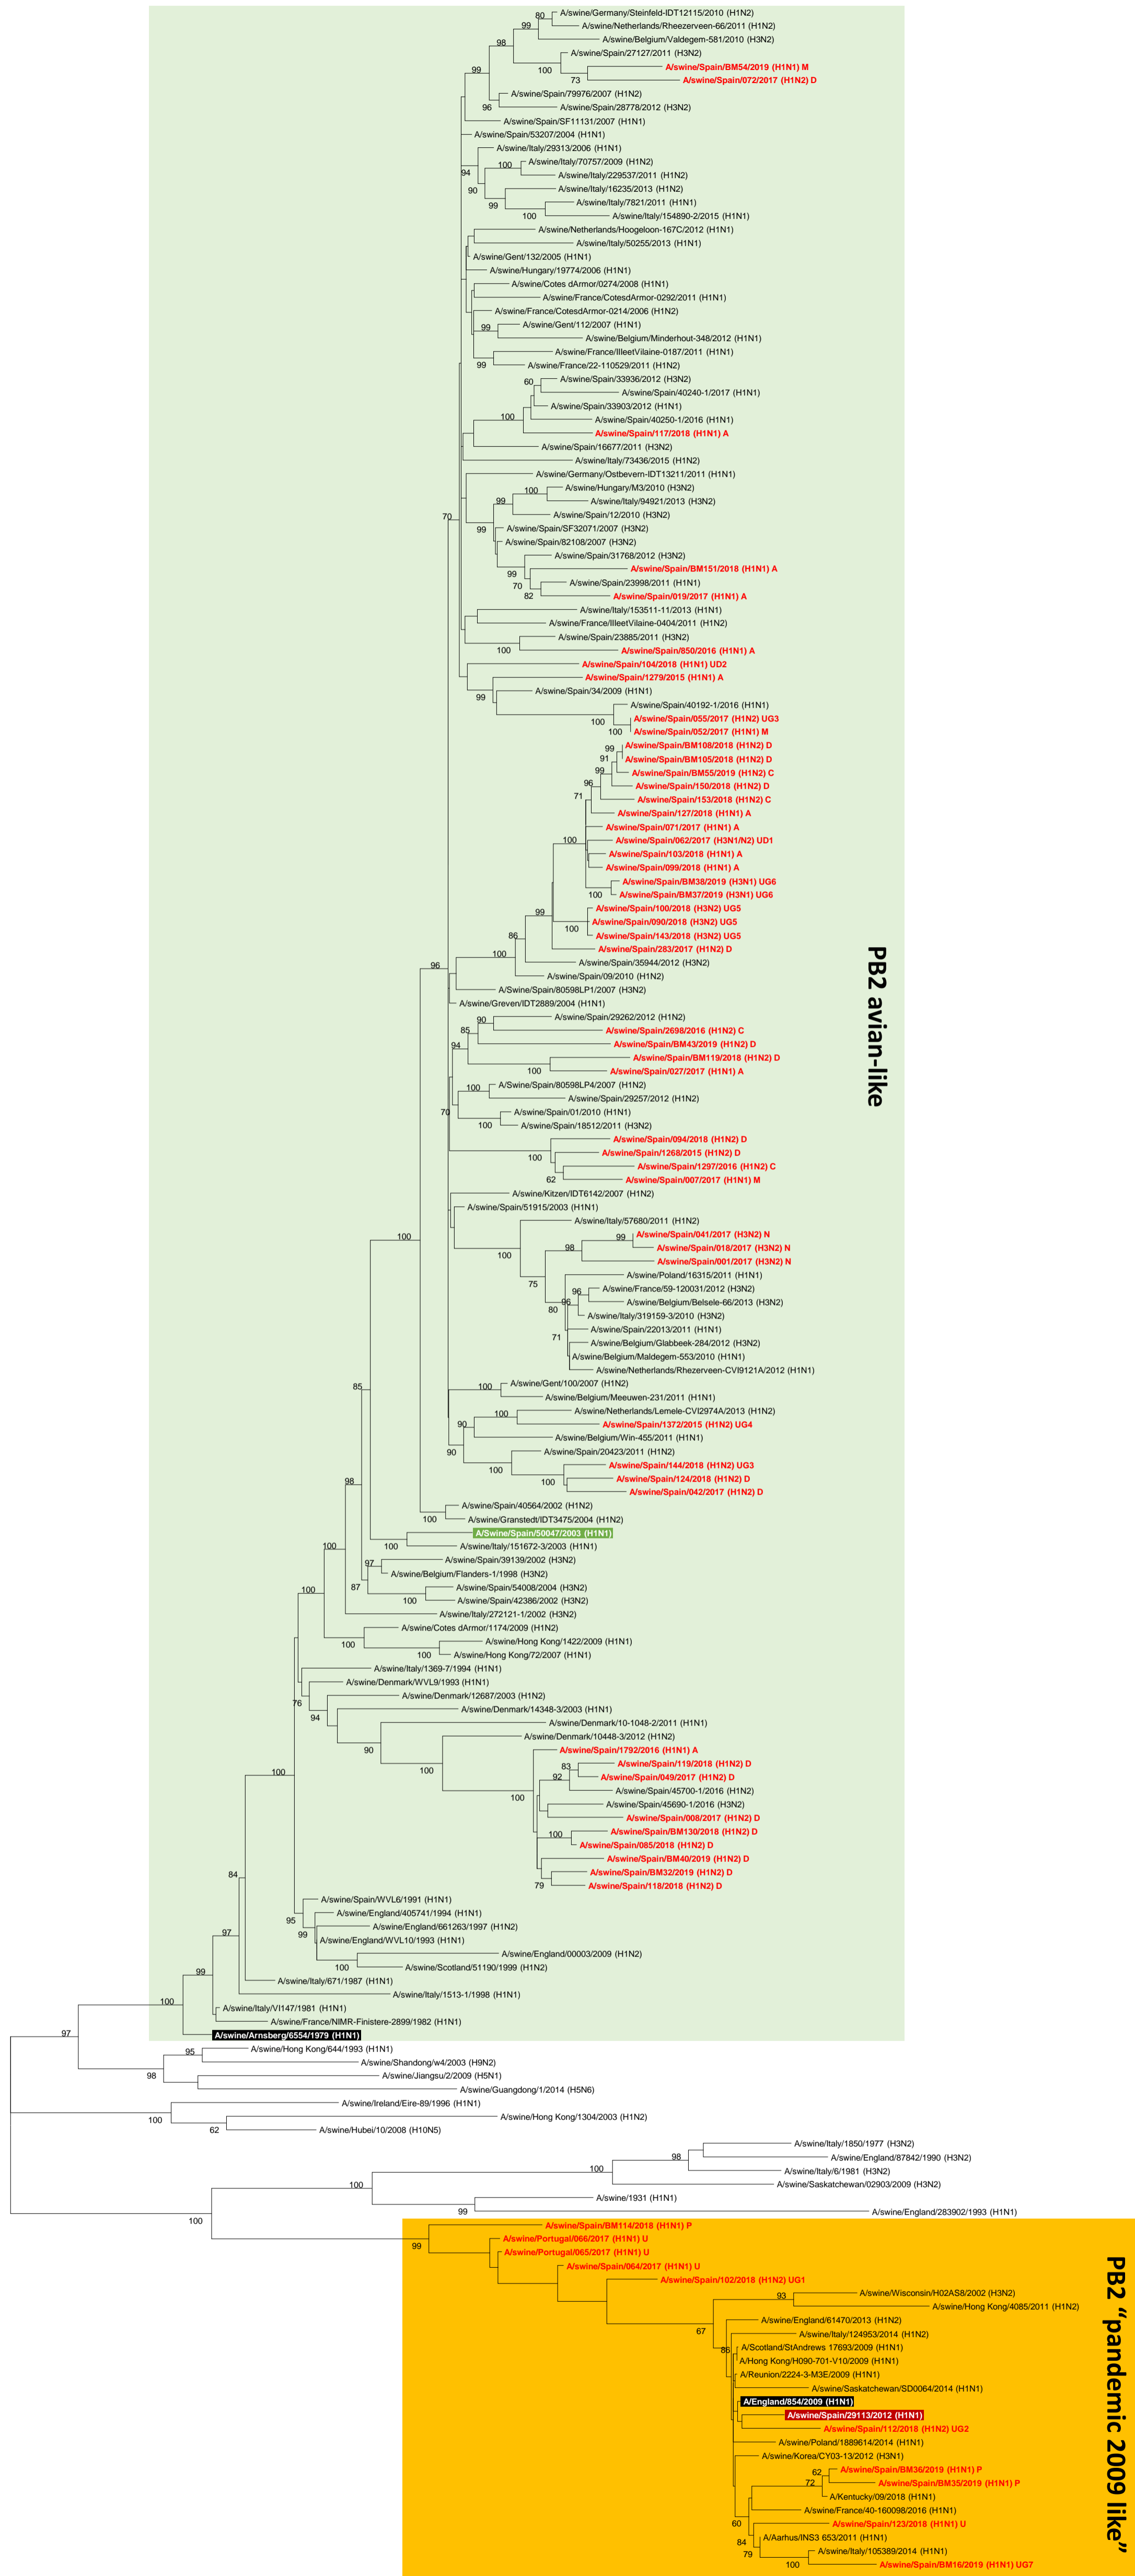

0.05

PB2 "pandemic 2009 like"

Supplement: TBED-68-519-s003.pdf [file TBED-68-519-s003.pdf]

PA

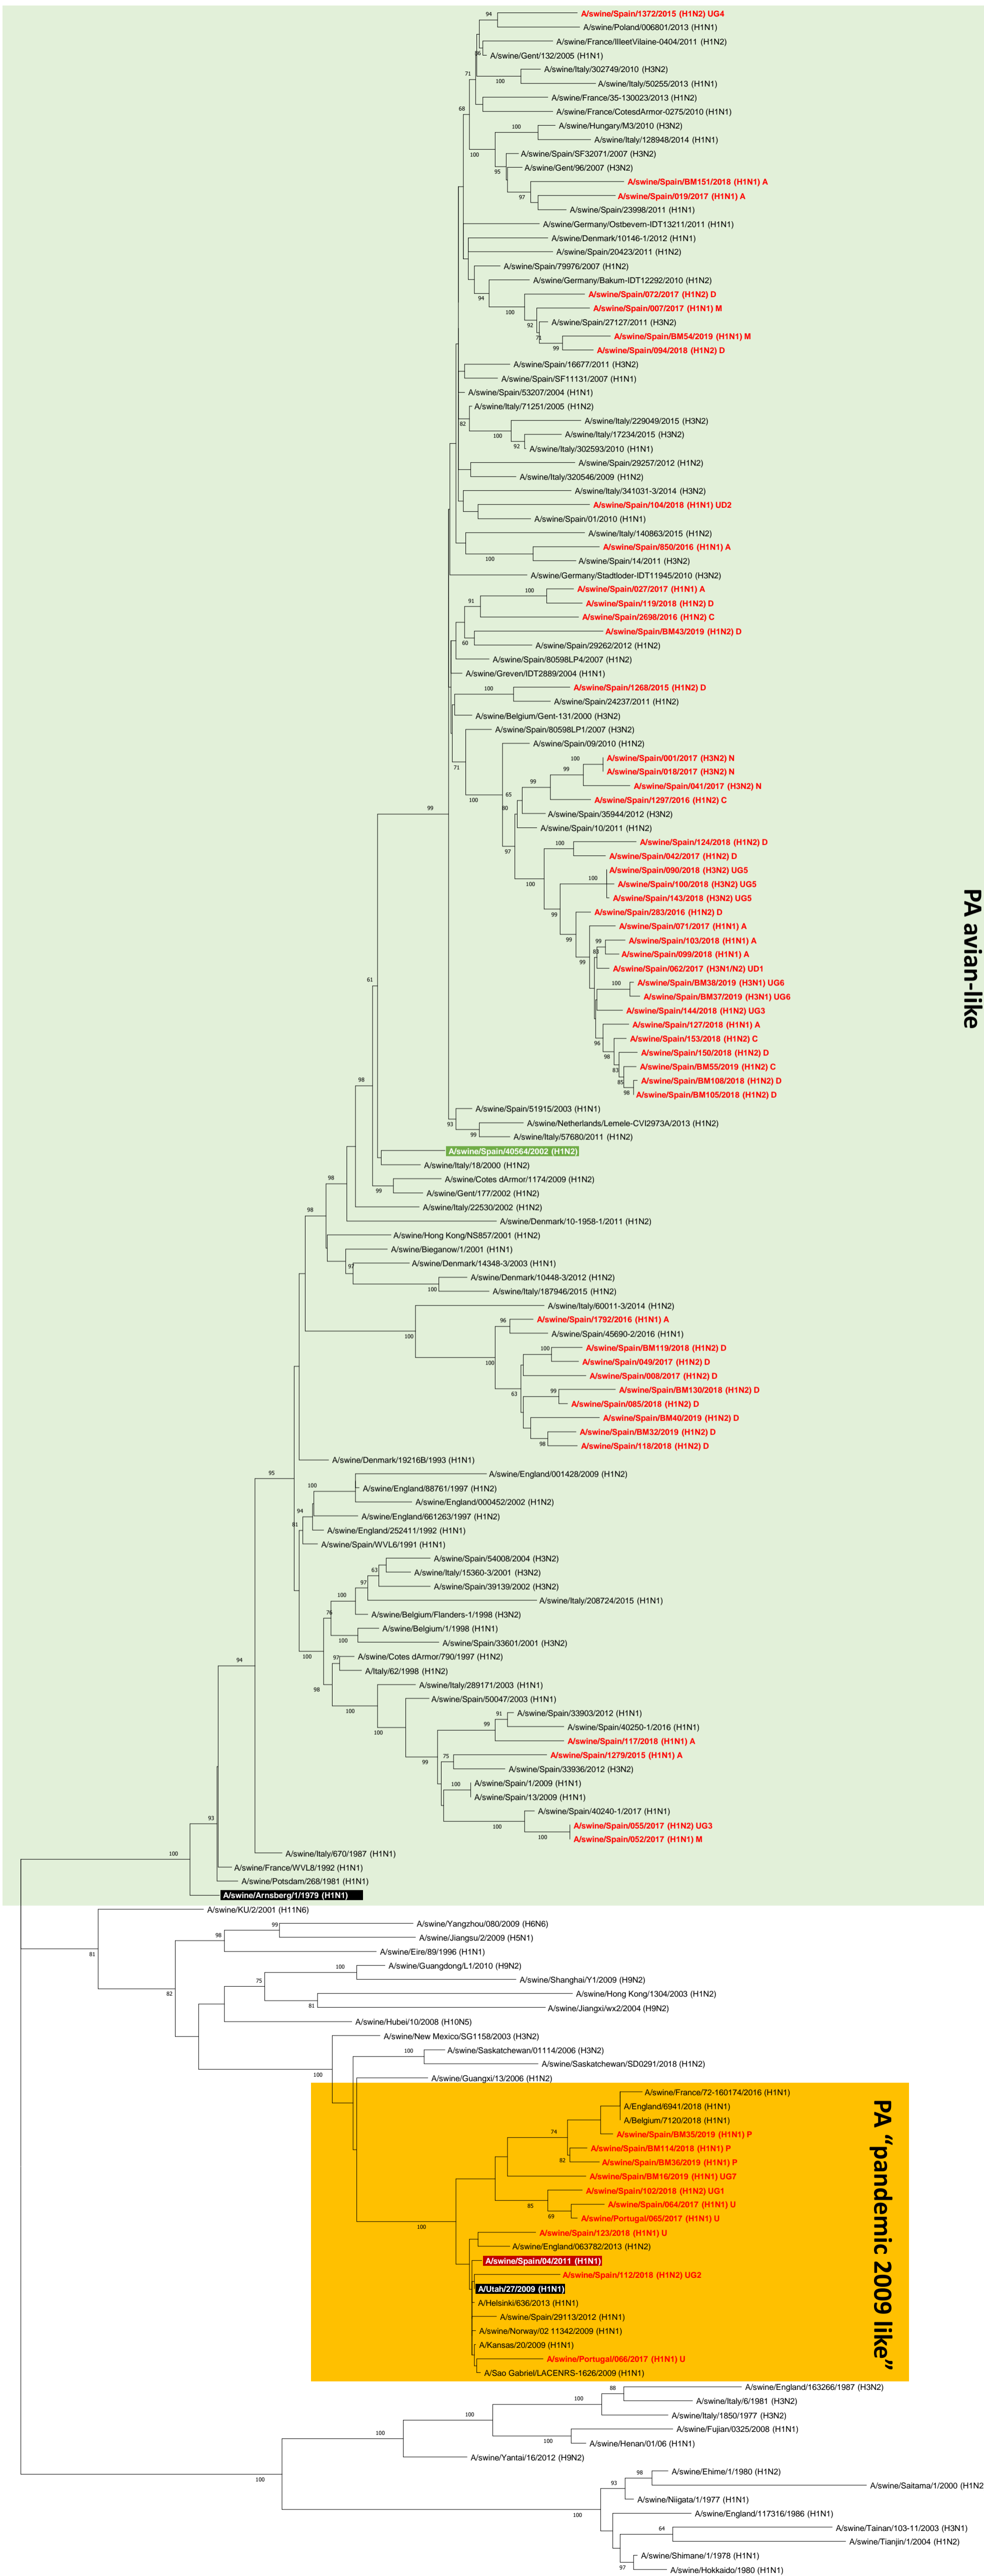

PA avian-like

PA "pandemic 2009 like"

0.05

Supplement: TBED-68-519-s004.pdf [file TBED-68-519-s004.pdf]

NP

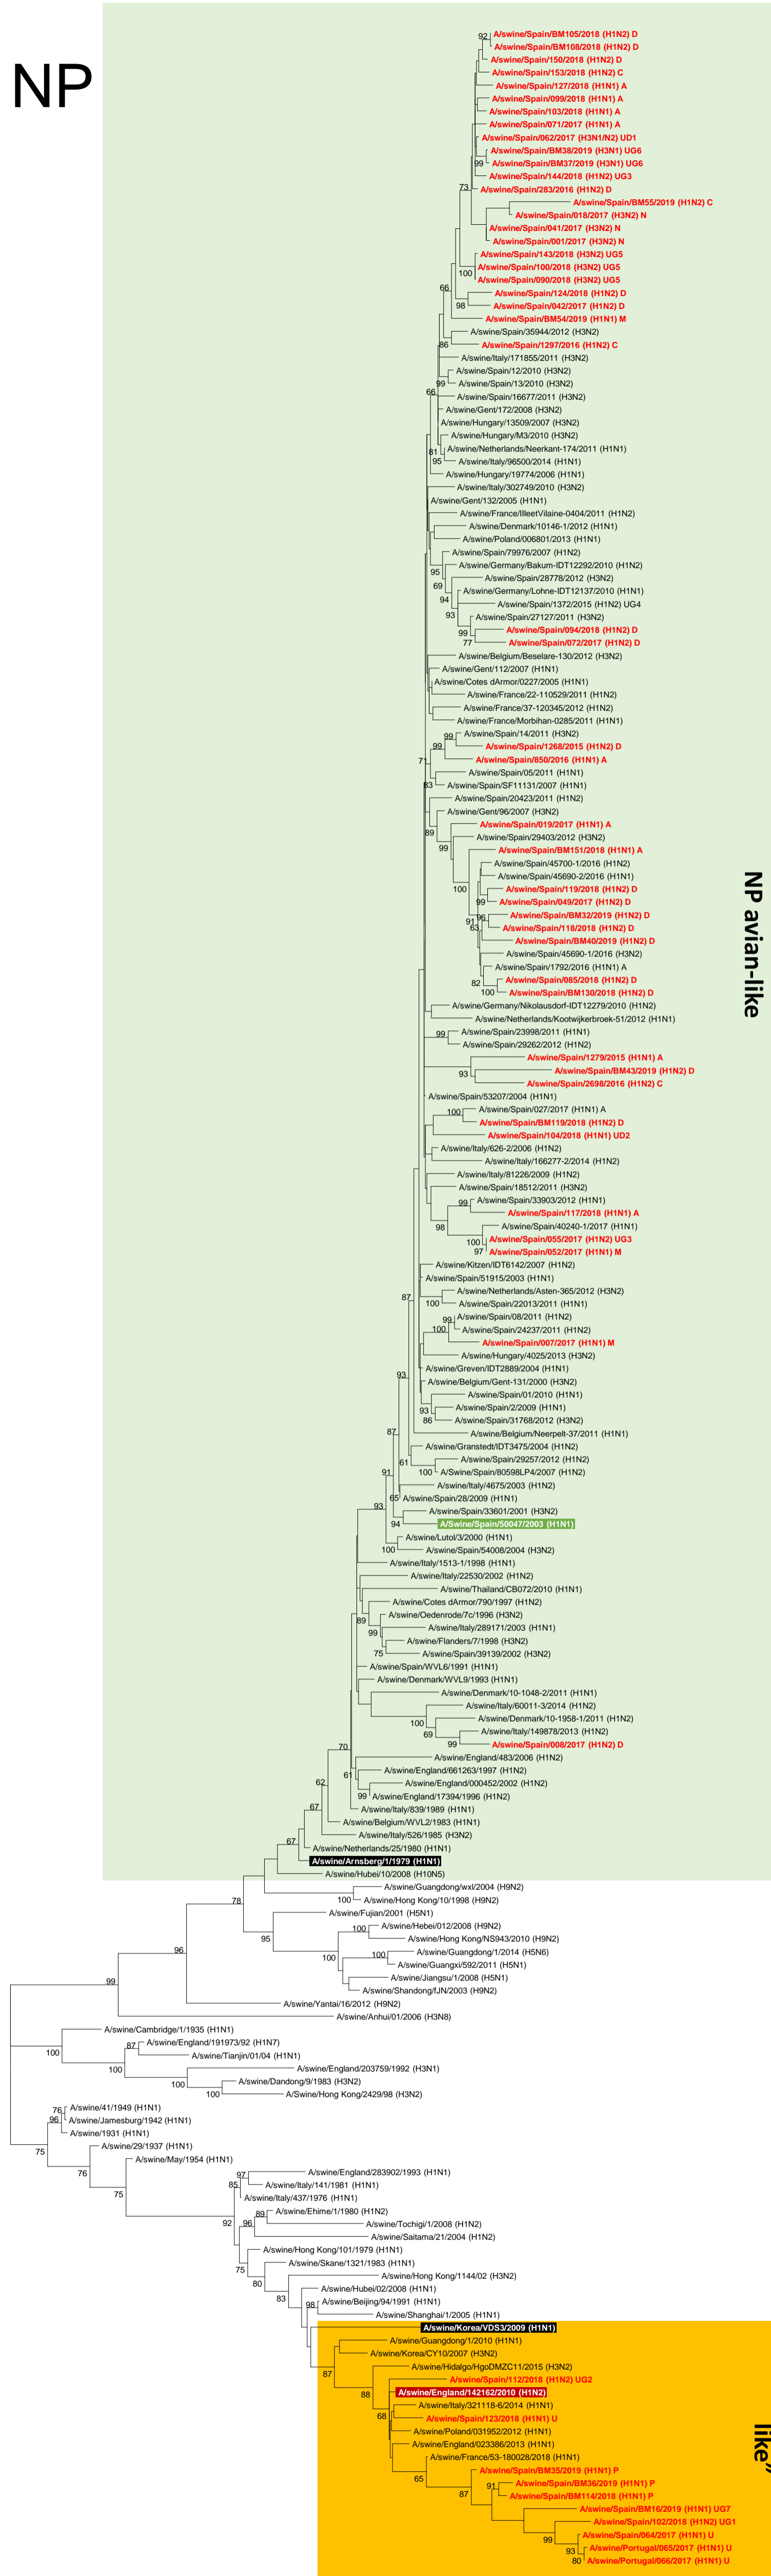

NP avian-like

NP "pandemic 2009 like"

0.05

Supplement: TBED-68-519-s007.pdf [file TBED-68-519-s007.pdf]
